# Supplementary material for: A Simple and Effective Protocol for the Pechmann Reaction to Obtain 4-Methylcoumarin Derivatives Using a High-Speed Mixer Ball Mill Process
Source: MDPI journal article supplement (doi:10.3390/chemistry5020073), 2023-05-08
Supplement: s1 [file s1]

Archive with 1 entries (1 files):
- chemistry-2378539-supplementary.pdf
